# Supplementary material for: Evaluation of Darolutamide (ODM201) Efficiency on Androgen Receptor Mutants Reported to Date in Prostate Cancer Patients
Source: MDPI journal article supplement (doi:10.3390/cancers13122939), 2021-06-11
Supplement: s1 [file s1]

**Table S1. AR mutations identified in the ligand binding domain (LBD) or the DNA binding domain (DBD).**

| AR mutant | AR region | Identified in                                                                                                  | Reference | Primers 5'-3'                                                                                |
|-----------|-----------|----------------------------------------------------------------------------------------------------------------|-----------|----------------------------------------------------------------------------------------------|
| T576A     | DBD       | PCa patient relapsing after leuporelin and flutamide treatment and with bone metastasis                        | 1, 2      | FW: GTCACATATGGAGCTCTCGCATGTGGAAGCTGCAAG<br>RV: CTTGCAGCTTCCACATGCGAGAGCTCCATAGTGAC          |
| K581R     | DBD       | Metastatic specimens of PCa patients                                                                           | 2         | FW: CTCACATGTGGAAGCTGCAGGGTCTTCTTCAAAAGAG<br>RV: CTCTTTTGAAGAAGACCCTGCAGCTTCCACATGTGAG       |
| A587V     | DBD       | Metastatic specimens of PCa patients                                                                           | 2         | FW: GGTCTTCTTCAAAAGAGTCGCTGAAGGGAAACAGA<br>RV: TCTGTTTCCCTTCAGCGACTCTTTTGAAGAAGACC           |
| A588S     | DBD       | Metastatic specimens of PCa patients                                                                           | 2         | FW: GGTCTTCTTCAAAAGAGCCAGTGAAGGGAAACAGAAGTAC<br>RV: GTACTTCTGTTTCCCTTCACTGGCTCTTTTGAAGAAGACC |
| L595M     | DBD       | Liver metastases of patient treated with bicalutamide                                                          | 3         | FW: AAGGGAAACAGAAGTACATGTGCGCCAGCAGAAA<br>RV: TTTCTGCTGGCGCACATGTACTTCTGTTTCCCTT             |
| C620Y     | DBD       | PCa patient with lymph node metastasis                                                                         | 2, 4      | FW: TCTTGTCGCTCTTCGGAAATATTATGAAGCAGGGATGAC<br>RV: GTCATCCCTGCTTCATAATATTTCCGAAGACGACAAGA    |
| R630Q     | Hinge     | PCa patient with lymph node metastasis                                                                         | 5, 6      | FW: GATGACTCTGGGAGCCAGAGCTGAAGAACTTG<br>RV: CAAGTTTCTTCAGCTTCTGGGCTCCAGAGTCATC               |
| K631T     | Hinge     | PCa patient before ADT                                                                                         | 5, 7      | FW: ACTCTGGGAGCCCGACGCTGAAGAACTTG<br>RV: CAAGTTTCTTCAGCGTCCGGGCTCCAGAGT                      |
| E666D     | Hinge     | Liver metastases of patient treated with bicalutamide                                                          | 3         | FW: AGAAGCTGACAGTGTACACATTGATGGCTATGAATGTC<br>RV: GACATTTCATAGCCATCAATGTGTGACACTGTCAGCTTCT   |
| Q671R     | LBD       | Primary tumor from PCa patient before ADT                                                                      | 7         | FW: ATTGAAGGCTATGAATGTCGGCCCATCTTTCTGAATGTC<br>RV: GACATTTCAGAAAGATGGGCCGACATTCATAGCCTTCAAT  |
| G684A     | LBD       | Patient with localized PCa                                                                                     | 8         | FW: AAGCCATTGAGCCAGCTGTAGTGTGTGCTGG<br>RV: CCAGCACACACTACAGCTGGCTCAATGGCTT                   |
| K721E     | LBD       | PCa patient with bone metastasis                                                                               | 9, 10     | FW: GGTCAAGTGGGCCGAGGCCTTGCTGG<br>RV: CCAGGCAAGGCCTCGGCCCACTTGACC                            |
| A722T     | LBD       | Patients with metastatic prostate cancer in relapse after orchiectomy or the administration of an LHRH agonist | 11        | FW: TCAAGTGGGCCAAGACCTTGCTTGCTTC<br>RV: GAAGCCAGGCAAGGTCTTGCCCCACTTGA                        |
| L723F     | LBD       | Patient with localized PCa                                                                                     | 12, 13    | FW: AAGTGGGCCAAGGCCTTCCCTGGCTTCCGCA<br>RV: TGCGGAAGCCAGGGAAGGCCTTGCCCCACTT                   |
| G725D     | LBD       | Patients with metastatic prostate cancer in relapse after orchiectomy or the administration of an LHRH agonist | 11        | FW: CCAAGGCCTTGCTGACTTCCGCAACTTACA<br>RV: TGTAAGTTGCGGAAGTCAGGCAAGGCCTTG                     |
| L745F     | LBD       | Latent carcinomas from Japanese males                                                                          | 14        | FW: GTACTCCTGGATGGGGTTCATGGTGTGGCCAT<br>RV: ATGGCAAACACCATGAACCCCATCCAGGAGTAC                |

|       |     |                                                                                               |        |                                                                                               |
|-------|-----|-----------------------------------------------------------------------------------------------|--------|-----------------------------------------------------------------------------------------------|
| A749T | LBD | Metastatic specimens of PCa patients                                                          | 2, 15  | FW: GATGGGGCTCATGGTGTTTACCATGGGCTG<br>RV: CAGCCCATGGTAAACACCATGAGCCCCATC                      |
| A749V | LBD | Latent carcinomas from Japanese males                                                         | 14     | FW: ATGGGGCTCATGGTGTTTGTTCATGGGCTGGCGAT<br>RV: ATCGCCAGCCCATGACAAACACCATGAGCCCCAT             |
| M750I | LBD | Latent carcinomas from Japanese males and orchiectomy-Bicalutamide-Refractory Prostate Cancer | 14, 16 | FW: GCTCATGGTGTTTGCCATAGGCTGGCGATC<br>RV: GATCGCCAGCCTATGGCAAACACCATGAGC                      |
| G751S | LBD | Latent carcinomas from Japanese males                                                         | 14     | FW: CATGGTGTTTGCCATGAGCTGGCGATCCTTCAC<br>RV: GTGAAGGATCGCCAGCTCATGGCAAACACCATG                |
| F755L | LBD | Latent carcinomas from Japanese males                                                         | 14     | FW: CCATGGGCTGGCGATCCTTAACCAATGTCAACTC<br>RV: GAGTTGACATTGGTTAAGGATCGCCAGCCCATGG              |
| T756A | LBD | Latent carcinomas from Japanese males                                                         | 14     | FW: GGCTGGCGATCCTTCGCCAATGTCAACTCCA<br>RV: TGGAGTTGACATTGGCGAAGGATCGCCAGCC                    |
| N757D | LBD | PCa tumors from bone-marrow biopsies after ADT withdrawal                                     | 17     | FW: CTGGCGATCCTTCACCGATGTCAACTCCAGGAT<br>RV: ATCCTGGAGTTGACATCGGTGAAGGATCGCCAG                |
| V758A | LBD | Metastatic specimens of PCa patients                                                          | 2      | FW: CGATCCTTCACCAATGCCAACTCCAGGATGCTC<br>RV: GAGCATCCTGGAGTTGGCATTGGTGAAGGATCG                |
| V758I | LBD | Patients with local tumor recurrence                                                          | 18     | FW: TGGCGATCCTTCACCAATATCAACTCCAGGATGC<br>RV: GCATCCTGGAGTTGATATTGGTGAAGGATCGCCA              |
| S760P | LBD | Latent carcinomas from Japanese males                                                         | 14     | FW: CCTTCACCAATGTCAACCCCAGGATGCTCTACTTC<br>RV: GAAGTAGAGCATCCTGGGGTTGACATTGGTGAAGG            |
| Y764C | LBD | Latent carcinomas from Japanese males                                                         | 14     | FW: CTCCAGGATGCTCTGCTTCGCCCCGTGATC<br>RV: GATCAGGGGCGAAGCAGAGCATCCTGGAG                       |
| S783N | LBD | Primary tumor from PCa patient before ADT                                                     | 7      | FW: TGCACAAGTCCCGGATGTACAACCAAGTGTGTCC<br>RV: GGACACACTGGTTGTACATCCGGGACTTGTGCA               |
| S792P | LBD | Primary tumor from PCa patient before ADT                                                     | 7      | FW: CCGAATGAGGCACCTCCCTCAAGAGTTTGGATG<br>RV: CATCCAAACTCTTGAGGGAGGTGCCTCATTCCG                |
| Q799E | LBD | Prostate carcinoma before treatment                                                           | 19     | FW: CAAGAGTTTGGATGGCTCGAGATCACCCCCAGGAATTC<br>RV: GAATTCCTGGGGGGTGATCTCGAGCCATCCAAACTCTTG     |
| I800T | LBD | Patient with localized PCa                                                                    | 12     | FW: AGAGTTTGGATGGCTCCAAACCACCCCCAGG<br>RV: CCTGGGGGGTGGTTTGGAGCCATCCAAACTCT                   |
| R847G | LBD | Metastatic specimens of PCa patients                                                          | 2      | FW: ATCGTATCATTGCATGCAAAGGAAAAAATCCCACATCCTGC<br>RV: GCAGGATGTGGGATTTTTTCCTTGCATGCAATGATACGAT |
| S866P | LBD | Metastatic specimens of PCa patients                                                          | 2      | FW: CCAAGCTCCTGGACCCCGTGCAGCCTATT<br>RV: AATAGGCTGCACGGGGTCCAGGAGCTTGG                        |
| V867M | LBD | Patients with local tumor recurrence and latent carcinomas                                    | 14, 18 | FW: AGCTCCTGGACTCCATGCAGCCTATTGCG<br>RV: CGCAATAGGCTGCATGGAGTCCAGGAGCT                        |
| E873Q | LBD | PCa patient after cyproterone acetate and chemotherapy                                        | 20     | FW: CGTGCAGCCTATTGCGAGACAGCTGCATCA<br>RV: TGATGCAGCTGTCTCGCAATAGGCTGCACG                      |

|       |     |                                                                                                                |    |                                                                                                |
|-------|-----|----------------------------------------------------------------------------------------------------------------|----|------------------------------------------------------------------------------------------------|
| D880G | LBD | PCa tumors from bone-marrow biopsies after ADT withdrawal                                                      | 17 | FW: GCTGCATCAGTTCACCTTTGGCCTGCTAATCAAGTCAC<br>RV: GTGACTTGATTAGCAGGCCAAAAGTGAAGTGCAGC          |
| L881Q | LBD | Patients with metastatic prostate cancer in relapse after orchiectomy or the administration of an LHRH agonist | 11 | FW: CATCAGTTCACCTTTGACCAGCTAATCAAGTCACACATG<br>RV: CATGTGTGACTTGATTAGCTGGTCAAAAGTGAAGTGCAGC    |
| M887I | LBD | PCa patient after orchiectomy and bicalutamide                                                                 | 20 | FW: ACCTGCTAATCAAGTCACACATAGTGAGCGTGGAC<br>RV: GTCCACGCTCACTATGTGTGACTTGATTAGCAGGT             |
| D891N | LBD | PCa patient after LHRH agonist                                                                                 | 21 | FW: CACACATGGTGAGCGTGAACCTTTCCGGAAATGATG<br>RV: CATCATTTCCGGAAAGTTCACGCTCACCATGTGTG            |
| A897T | LBD | Patients with metastatic prostate cancer in relapse after orchiectomy or the administration of an LHRH agonist | 11 | FW: GGACTTTCCGGAAATGATGACGGAGATCATCTCTGTGCAAG<br>RV: CTTGCACAGAGATGATCTCCGTCATCATTTCCGGAAAGTCC |
| Q903R | LBD | Patients with metastatic prostate cancer in relapse after orchiectomy or the administration of an LHRH agonist | 11 | FW: GGCAGAGATCATCTCTGTGAGAGTGCCCAAGATCCTTTCT<br>RV: AGAAAGGATCTTGGGCACTCTCACAGAGATGATCTCTGCC   |
| G910E | LBD | Latent carcinomas from Japanese males                                                                          | 14 | FW: GCCCAAGATCCTTTCTGAGAAAGTCAAGCCCATCT<br>RV: AGATGGGCTTGACTTTCTCAGAAAGGATCTTGGGC             |
| K911R | LBD | PCa patient after refractory to hormone therapy                                                                | 22 | FW: GCCCAAGATCCTTTCTGGGAGAGTCAAGCCCATC<br>RV: GATGGGCTTGACTCTCCAGAAAGGATCTTGGGC                |
| Q920R | LBD | Metastatic specimens of PCa patients                                                                           | 2  | FW: ATCTATTTCCACACCCGGTGAAGGATCCACTAGT<br>RV: ACTAGTGGATCCTTCACCGGGTGTGGAATAGAT                |

1. Monge A, Jagla M, Lapouge G, et al. Unfaithfulness and promiscuity of a mutant androgen receptor in a hormone-refractory prostate cancer. *Cellular and molecular life sciences : CMLS*. Feb 2006;63(4):487-97. doi:10.1007/s00018-005-5471-y
2. Marcelli M, Ittmann M, Mariani S, et al. Androgen receptor mutations in prostate cancer. *Cancer research*. Feb 15 2000;60(4):944-9.
3. Steinkamp MP, O'Mahony OA, Brogley M, et al. Treatment-dependent androgen receptor mutations in prostate cancer exploit multiple mechanisms to evade therapy. *Cancer research*. May 15 2009;69(10):4434-42. doi:10.1158/0008-5472.can-08-3605
4. Nazareth LV, Stenoien DL, Bingman WE, 3rd, et al. A C619Y mutation in the human androgen receptor causes inactivation and mislocalization of the receptor with concomitant sequestration of SRC-1 (steroid receptor coactivator 1). *Molecular endocrinology (Baltimore, Md)*. Dec 1999;13(12):2065-75. doi:10.1210/mend.13.12.0382
5. Haelens A, Tanner T, Denayer S, Callewaert L, Claessens F. The hinge region regulates DNA binding, nuclear translocation, and transactivation of the androgen receptor. *Cancer research*. May 1 2007;67(9):4514-23. doi:10.1158/0008-5472.can-06-1701
6. Wang C, Uchida T. [Androgen receptor gene mutations in prostate cancer]. *Nihon Hinyokika Gakkai zasshi The japanese journal of urology*. May 1997;88(5):550-6. doi:10.5980/jpnjurol1989.88.550

7. Tilley WD, Buchanan G, Hickey TE, Bentel JM. Mutations in the androgen receptor gene are associated with progression of human prostate cancer to androgen independence. *Clinical cancer research : an official journal of the American Association for Cancer Research*. Feb 1996;2(2):277-85.
8. Koivisto P, Kononen J, Palmberg C, et al. Androgen receptor gene amplification: a possible molecular mechanism for androgen deprivation therapy failure in prostate cancer. *Cancer research*. Jan 15 1997;57(2):314-9.
9. Duff J, McEwan IJ. Mutation of histidine 874 in the androgen receptor ligand-binding domain leads to promiscuous ligand activation and altered p160 coactivator interactions. *Molecular endocrinology (Baltimore, Md)*. Dec 2005;19(12):2943-54. doi:10.1210/me.2005-0231
10. Hay CW, McEwan IJ. The impact of point mutations in the human androgen receptor: classification of mutations on the basis of transcriptional activity. *PloS one*. 2012;7(3):e32514. doi:10.1371/journal.pone.0032514
11. Taplin ME, Bubley GJ, Shuster TD, et al. Mutation of the androgen-receptor gene in metastatic androgen-independent prostate cancer. *The New England journal of medicine*. May 25 1995;332(21):1393-8. doi:10.1056/nejm199505253322101
12. Sanchez D, Rosell D, Honorato B, Lopez J, Arocena J, Sanz G. Androgen receptor mutations are associated with Gleason score in localized prostate cancer. *BJU international*. Dec 2006;98(6):1320-5. doi:10.1111/j.1464-410X.2006.06438.x
13. Hiort O, Sinnecker GH, Holterhus PM, Nitsche EM, Kruse K. The clinical and molecular spectrum of androgen insensitivity syndromes. *American journal of medical genetics*. May 3 1996;63(1):218-22. doi:10.1002/(sici)1096-8628(19960503)63:1<218::aid-ajmg38>3.0.co;2-p
14. Takahashi H, Furusato M, Allsbrook WC, Jr., et al. Prevalence of androgen receptor gene mutations in latent prostatic carcinomas from Japanese men. *Cancer research*. Apr 15 1995;55(8):1621-4.
15. James AJ, AgoulNIK IU, Harris JM, et al. A novel androgen receptor mutant, A748T, exhibits hormone concentration-dependent defects in nuclear accumulation and activity despite normal hormone-binding affinity. *Molecular endocrinology (Baltimore, Md)*. Dec 2002;16(12):2692-705. doi:10.1210/me.2001-0281
16. Haapala K, Hyytinen ER, Roiha M, et al. Androgen receptor alterations in prostate cancer relapsed during a combined androgen blockade by orchiectomy and bicalutamide. *Laboratory investigation; a journal of technical methods and pathology*. Dec 2001;81(12):1647-51. doi:10.1038/labinvest.3780378
17. Taplin ME, Rajeshkumar B, Halabi S, et al. Androgen receptor mutations in androgen-independent prostate cancer: Cancer and Leukemia Group B Study 9663. *Journal of clinical oncology : official journal of the American Society of Clinical Oncology*. Jul 15 2003;21(14):2673-8. doi:10.1200/jco.2003.11.102
18. Hyytinen ER, Haapala K, Thompson J, et al. Pattern of somatic androgen receptor gene mutations in patients with hormone-refractory prostate cancer. *Laboratory investigation; a journal of technical methods and pathology*. Nov 2002;82(11):1591-8. doi:10.1097/01.lab.0000038924.67707.75

19. Evans BA, Harper ME, Daniells CE, et al. Low incidence of androgen receptor gene mutations in human prostatic tumors using single strand conformation polymorphism analysis. *The Prostate*. Mar 1996;28(3):162-71. doi:10.1002/(sici)1097-0045(199603)28:3<162::aid-pros3>3.0.co;2-h
20. Chen G, Wang X, Zhang S, et al. Androgen receptor mutants detected in recurrent prostate cancer exhibit diverse functional characteristics. *The Prostate*. Jun 1 2005;63(4):395-406. doi:10.1002/pros.20191
21. Taplin ME, Bubley GJ, Ko YJ, et al. Selection for androgen receptor mutations in prostate cancers treated with androgen antagonist. *Cancer research*. Jun 1 1999;59(11):2511-5.
22. Watanabe M, Ushijima T, Shiraishi T, et al. Genetic alterations of androgen receptor gene in Japanese human prostate cancer. *Japanese journal of clinical oncology*. Dec 1997;27(6):389-93. doi:10.1093/jjco/27.6.389
