# Supplementary material for: Evaluation of Darolutamide (ODM201) Efficiency on Androgen Receptor Mutants Reported to Date in Prostate Cancer Patients
Source: MDPI journal article supplement (doi:10.3390/cancers13122939), 2021-06-11

Table S2: The response of PCa-associated mutants to increasing concentrations of steroids (dihydrotestosterone, progesterone, estradiol and hydrocortisone) and AR antagonists (bicalutamide, enzalutamide and darolutamide).

| AR mutant | Activation          |              |           |                | Inhibition   |              |              |
|-----------|---------------------|--------------|-----------|----------------|--------------|--------------|--------------|
|           | Dihydrotestosterone | Progesterone | Estradiol | Hydrocortisone | Bicalutamide | Enzalutamide | Darolutamide |
| WT-AR     |                     |              |           |                |              |              |              |
| T576A     |                     |              |           |                |              |              |              |
| K581R     |                     |              |           |                |              |              |              |
| A587V     |                     |              |           |                |              |              |              |
| A588S     |                     |              |           |                |              |              |              |
| L595M     |                     |              |           |                |              |              |              |

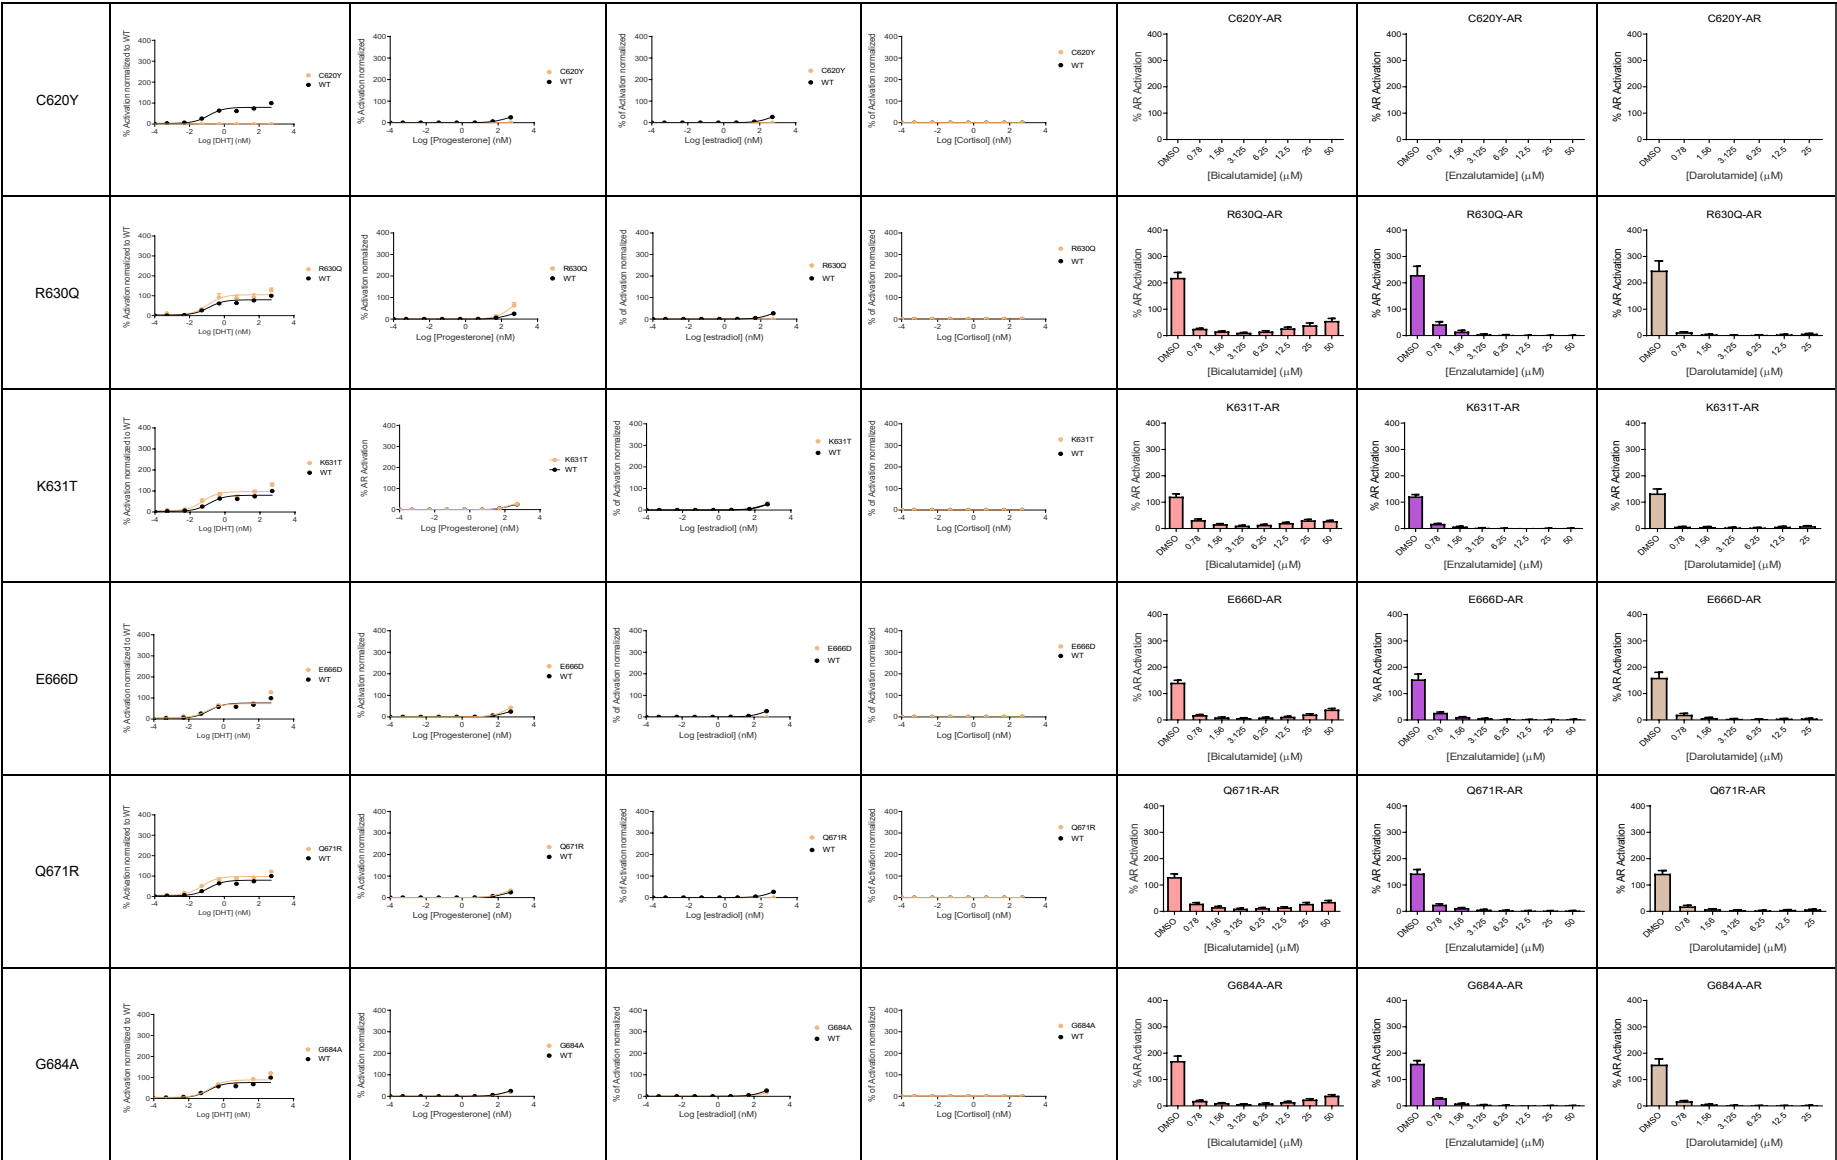

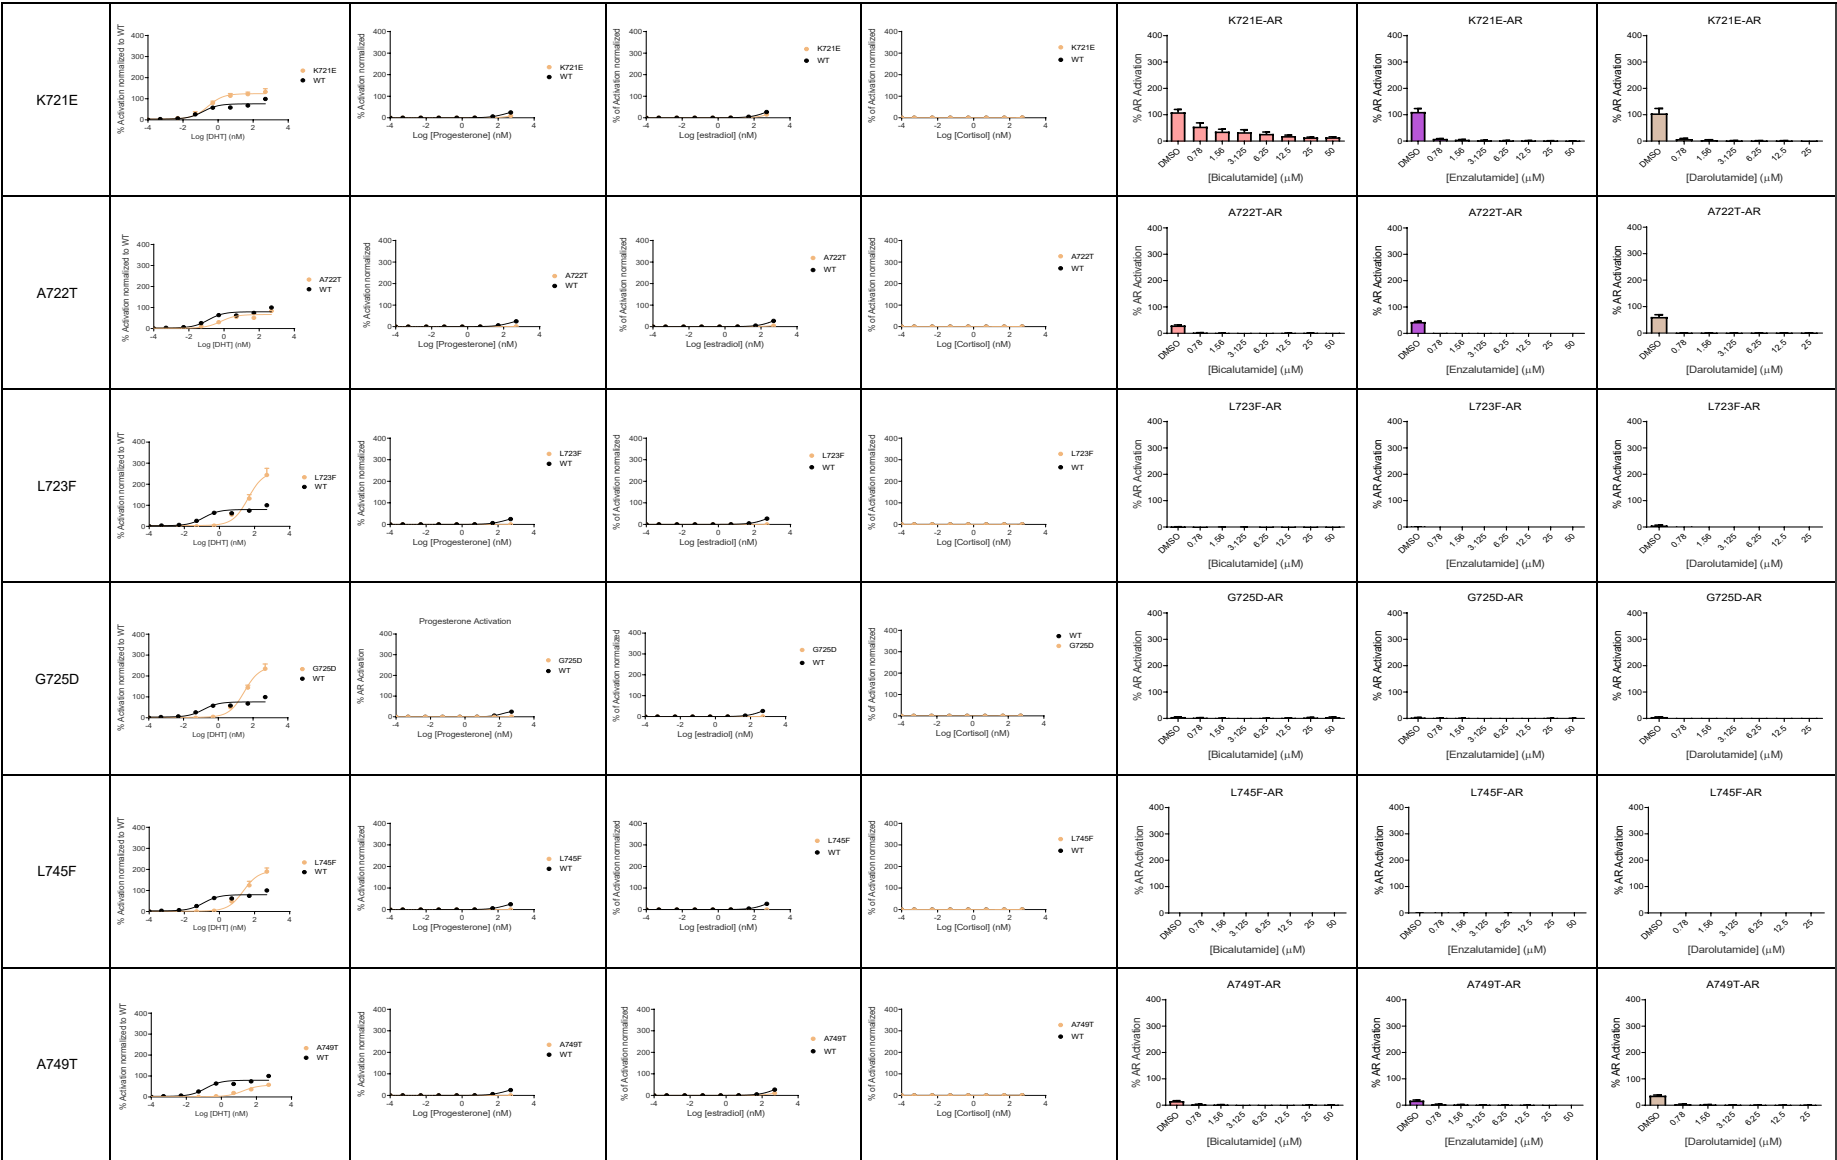

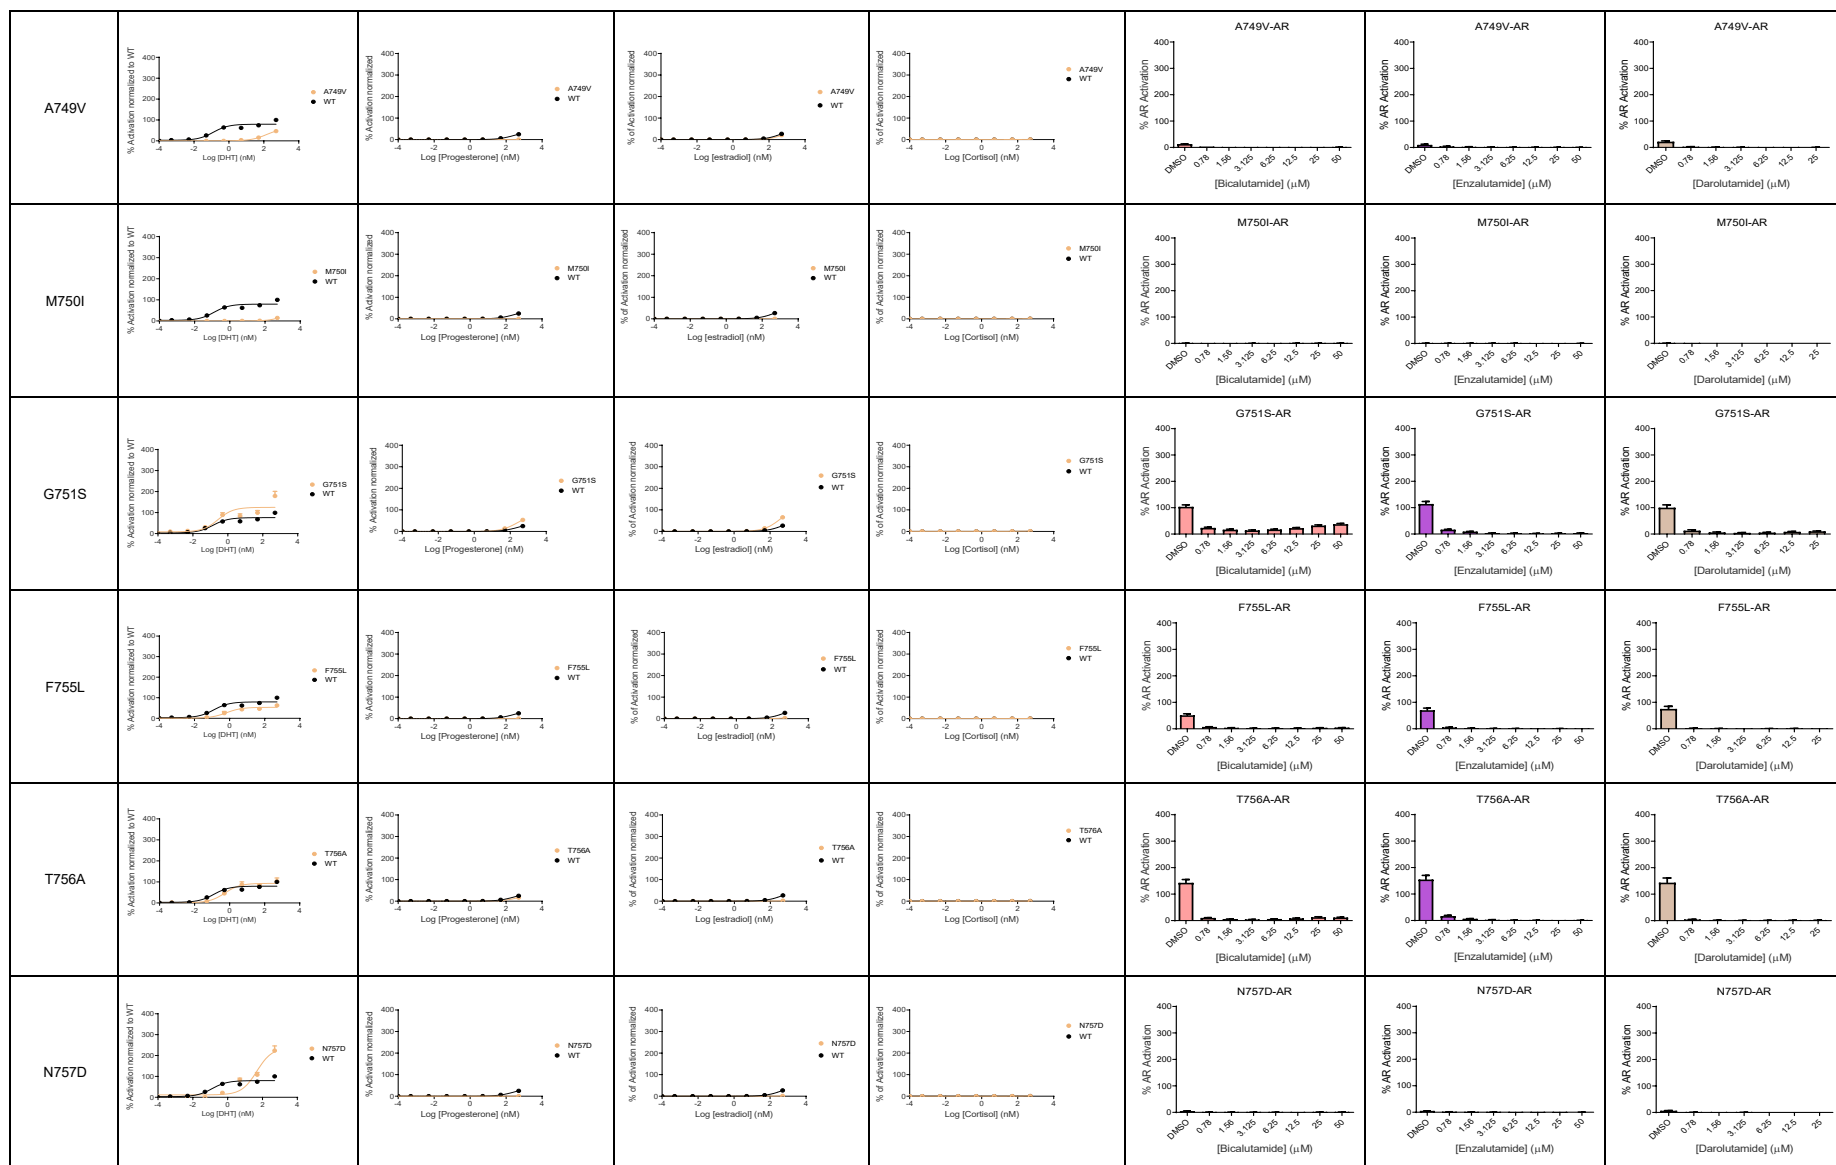

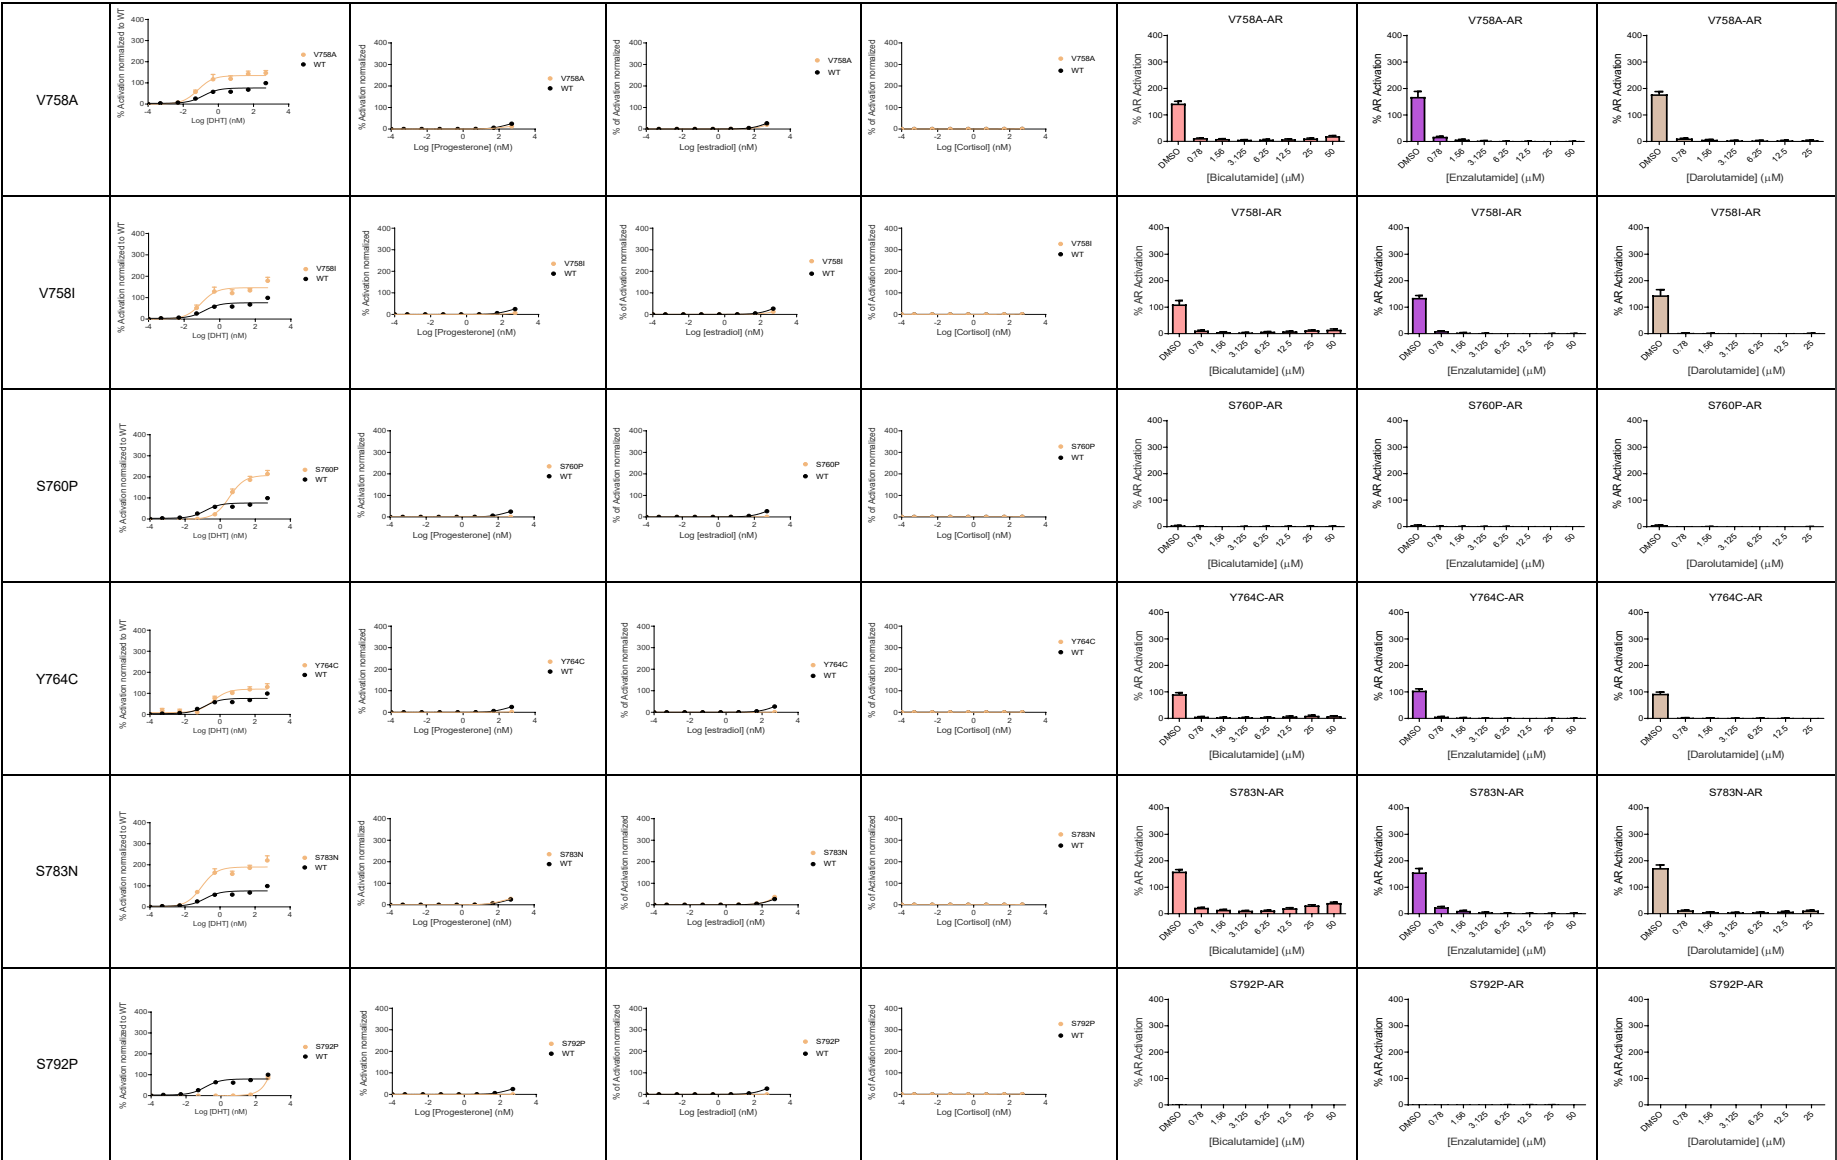

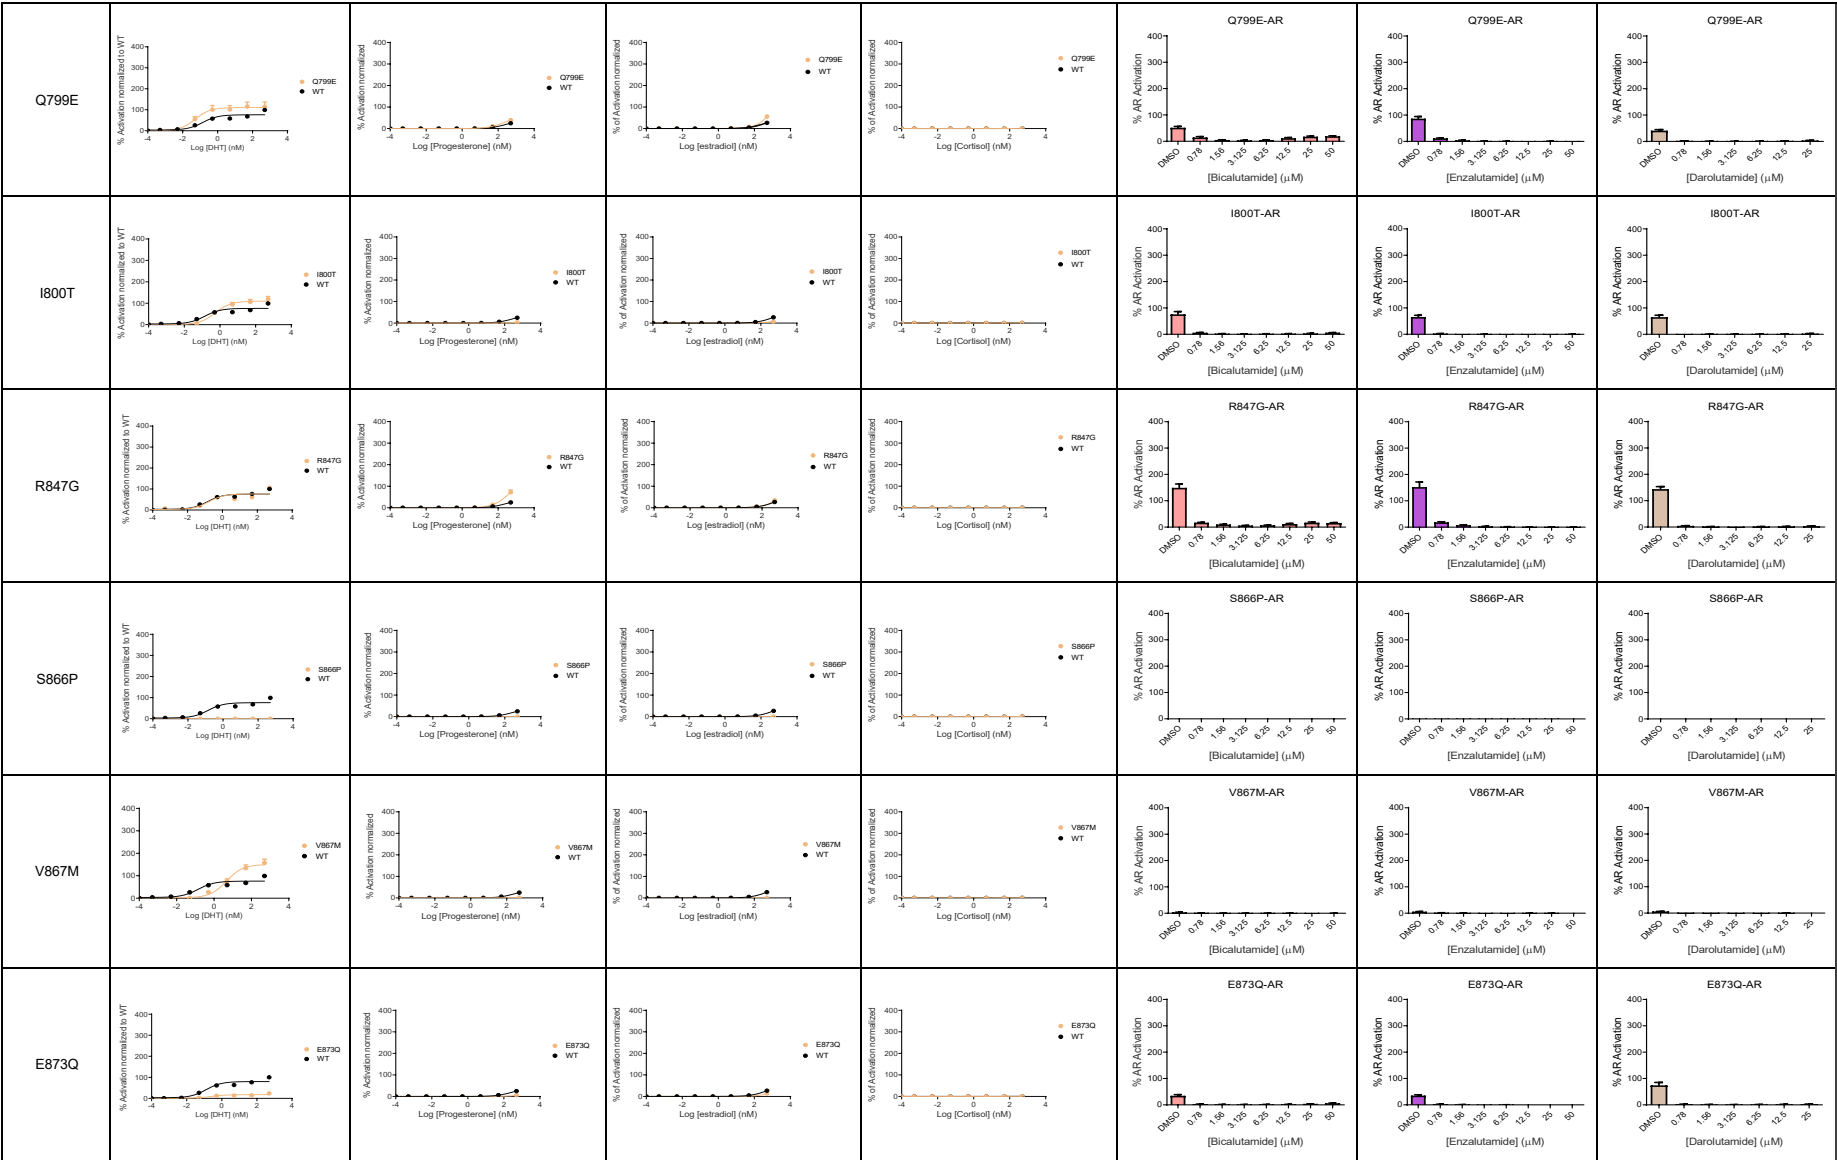

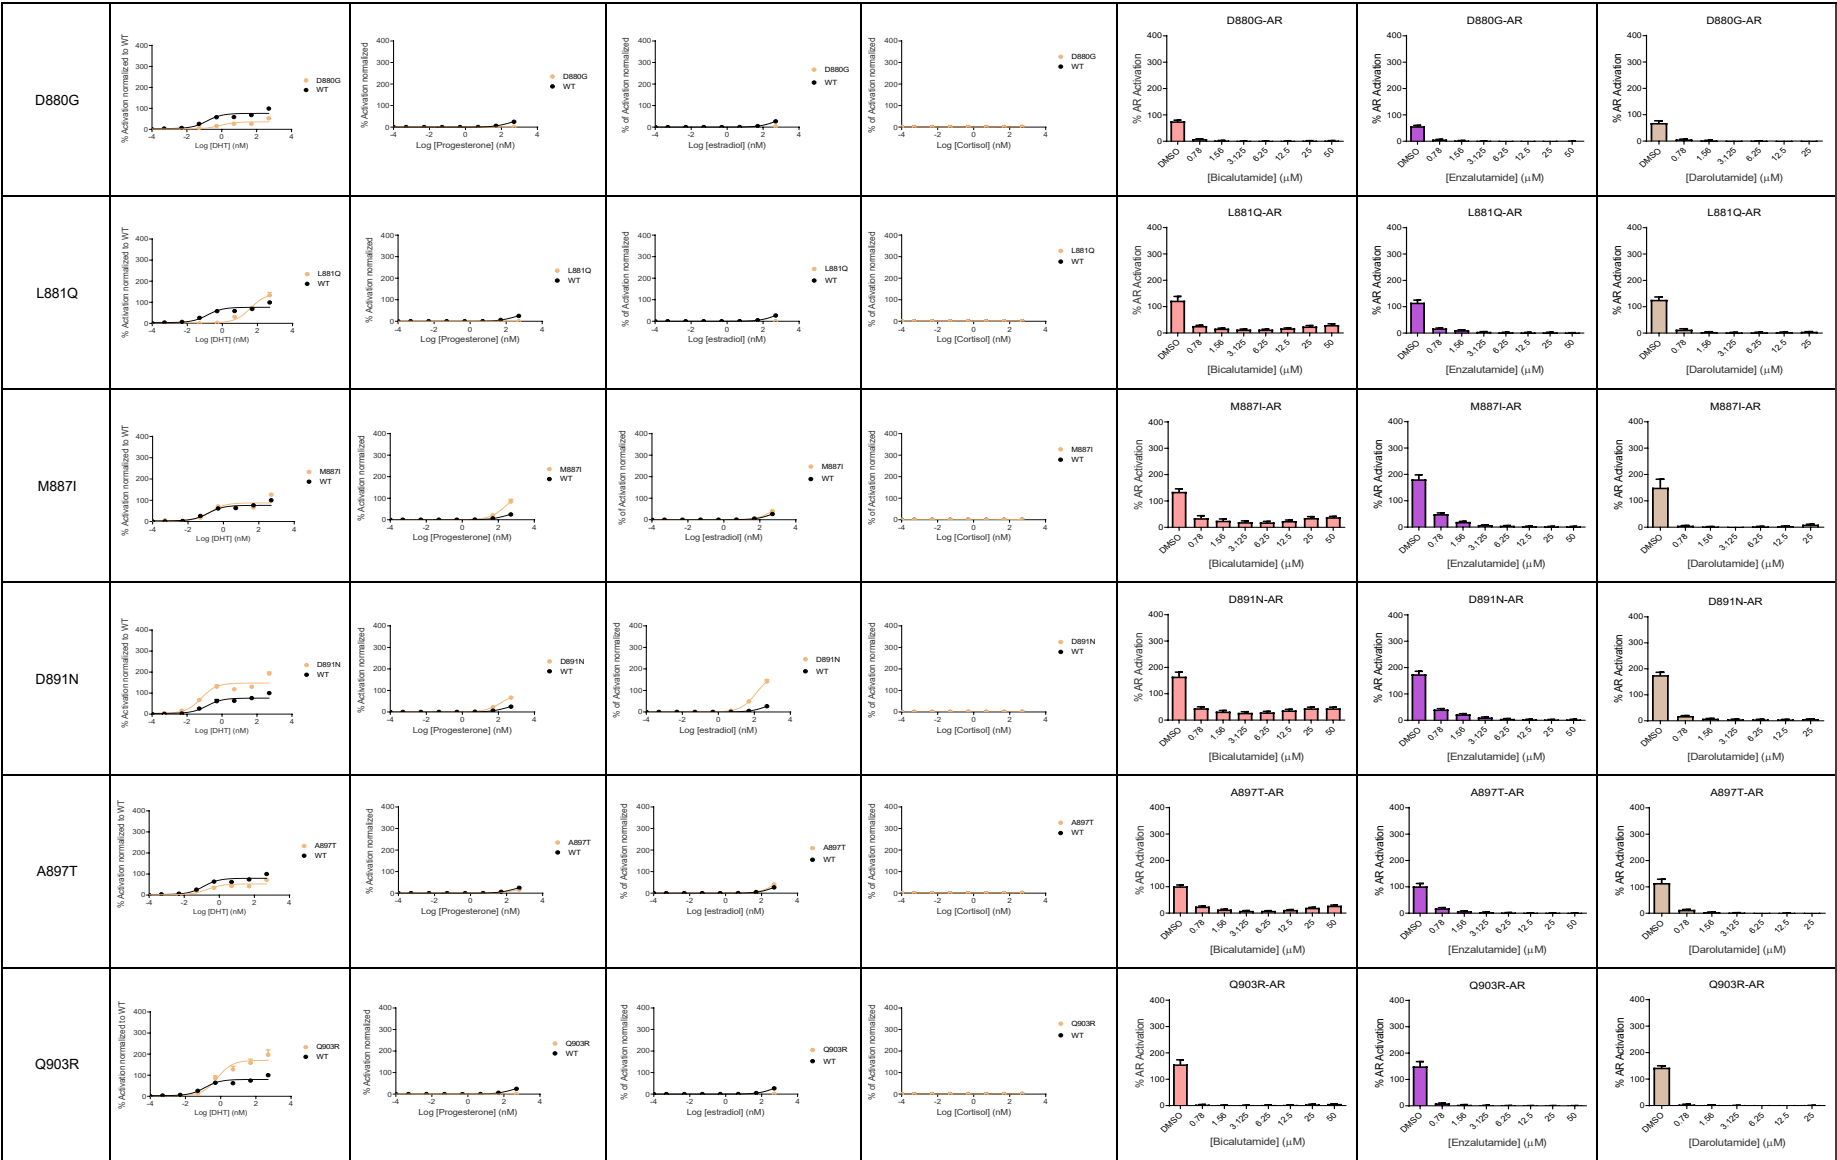

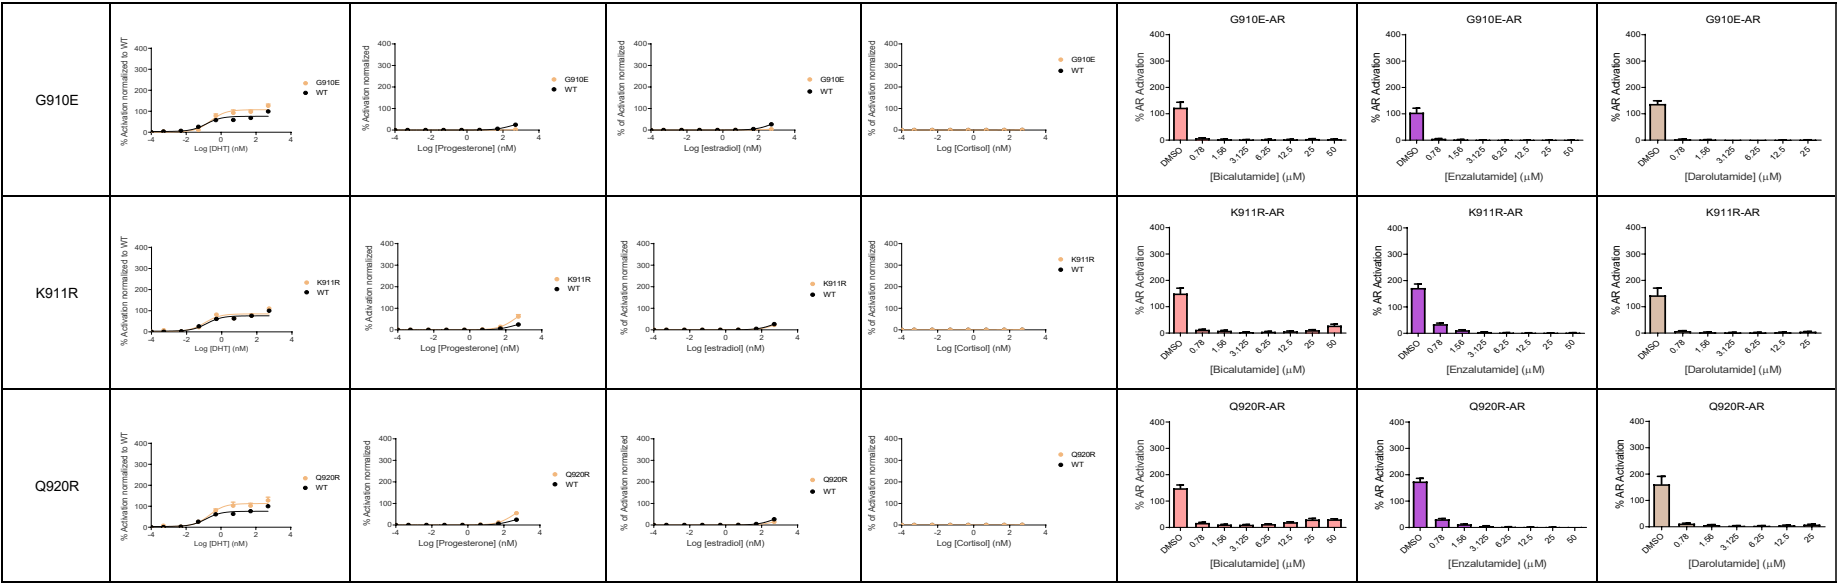

Supplement: s1 [file s1]
