# Supplementary figures and images for: Evaluation of Darolutamide (ODM201) Efficiency on Androgen Receptor Mutants Reported to Date in Prostate Cancer Patients
Source: MDPI journal article supplement (doi:10.3390/cancers13122939), 2021-06-11

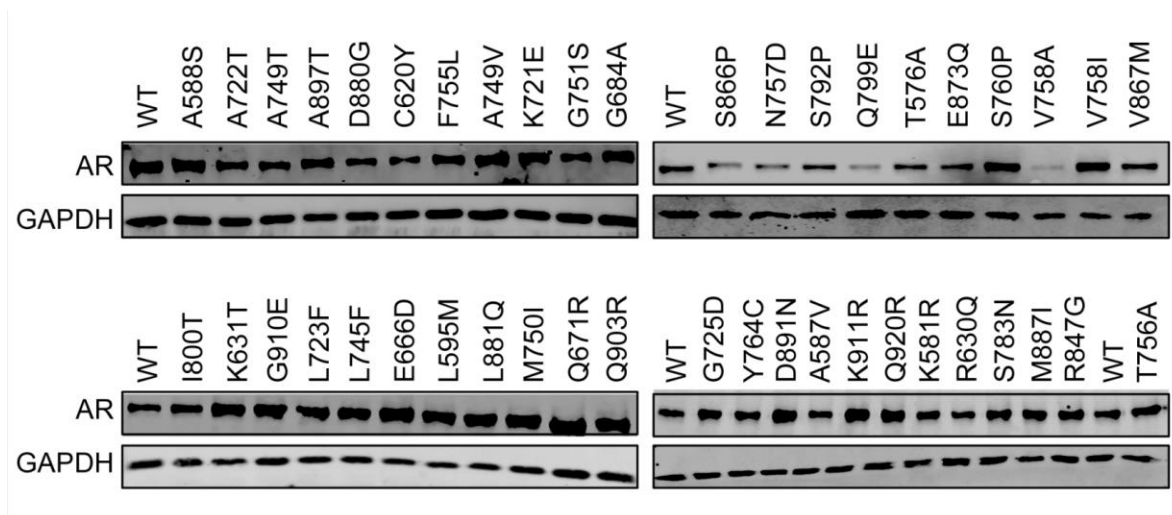

**Figure S1.** Western blot showing expression level of the PCa-associated AR mutants.

Supplement: s1 [file s1]
